# Supplementary material for: Improvement in the Stability and Enzymatic Activity of Pleurotus sapidus Lipoxygenase Dissolved in Natural Deep Eutectic Solvents (NADESs)
Source: MDPI journal article supplement (doi:10.3390/life14020271), 2024-02-18

## Supplementary data

Figure S1: Purification of the recombinant LOX<sub>PSA</sub> by Ni-NTA affinity chromatography. SDS-PAGE stained with Coomassie Brilliant Blue. 1 and 4: non purified culture supernatant 2: LOX<sub>PSA</sub> before buffering, 3: LOX<sub>PSA</sub>, 5 and 6: washing steps, M: molecular mass marker.

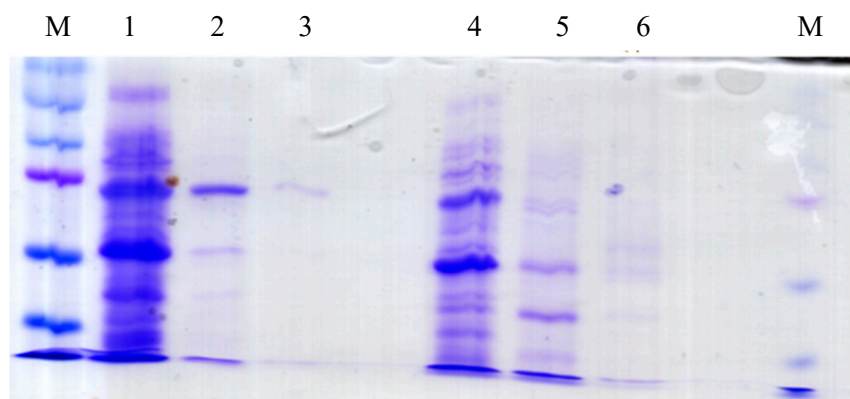

Supplement: s1 [file s1]
